# Supplementary material
Source: HighWire-hosted journal article supplement (https://www.cmajopen.ca/highwire/filestream/80941/field_highwire_adjunct_files/3/open-2015-0057-4-at.pdf)
Supplement: open-2015-0057-4-at.pdf [file open-2015-0057-4-at.pdf]

**Appendix 4 (as supplied by the authors): forest plots**

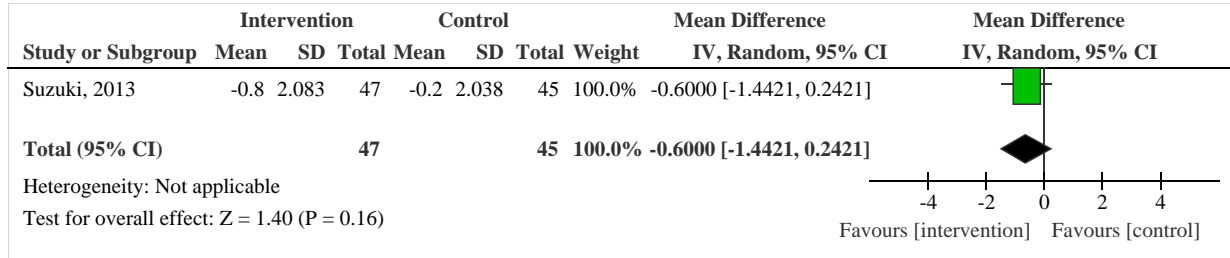

**Figure S1. Forest Plot: Effect of non-pharmacological interventions on Cognition assessed with ADAS-Cog**

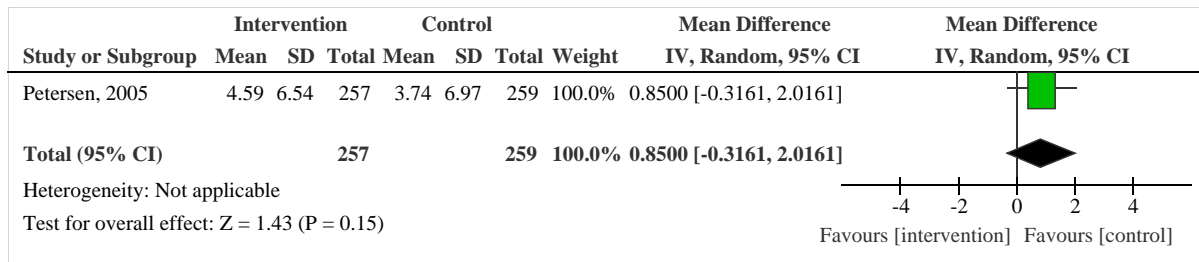

**Figure S2. Forest Plot: Effect of Dietary supplements/Vitamins on Cognition assessed with ADAS-Cog**

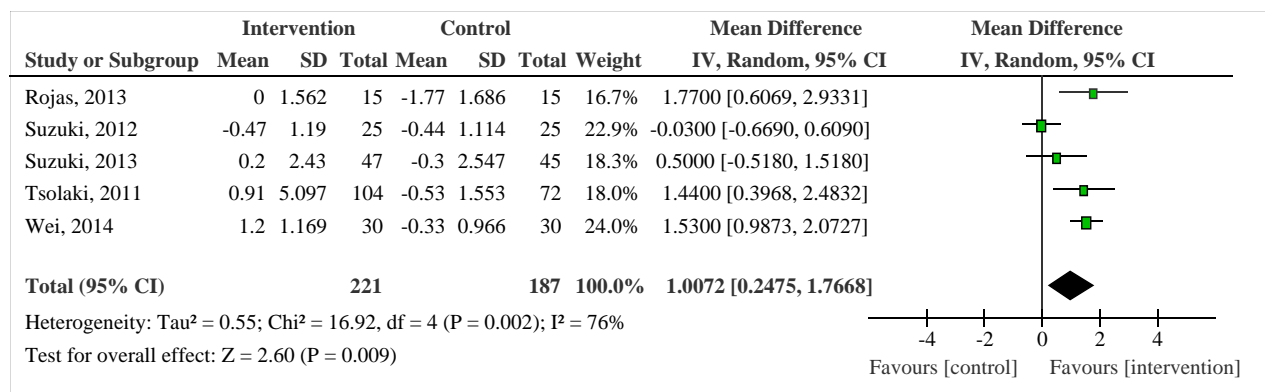

**Figure S3. Forest Plot: Effect of non-pharmacological interventions on Cognition assessed with MMSE**

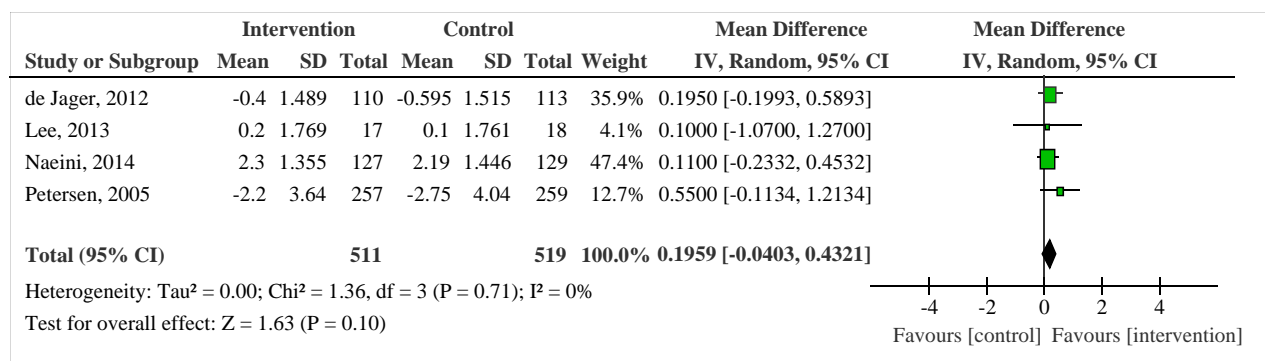

**Figure S4. Forest Plot: Effect of Dietary supplements/ Vitamins on Cognition with MMSE**

**List of studies:**

- Suzuki T, Shimada H, Makizako H, et al. A randomized controlled trial of multicomponent exercise in older adults with mild cognitive impairment. *PLoS ONE* 2013;8:e61483.
- Petersen RC, Thomas RG, Grundman M, et al. Vitamin E and donepezil for the treatment of mild cognitive impairment. *N Engl J Med* 2005;352:2379-88.
- Rojas GJ, Villar V, Iturry M, et al. Efficacy of a cognitive intervention program in patients with mild cognitive impairment. *Int Psychogeriatr* 2013;25:825-31.
- Suzuki T, Shimada H, Makizako H, et al. Effects of multicomponent exercise on cognitive function in older adults with amnesic mild cognitive impairment: a randomized controlled trial. *BMC Neurol* 2012;12:128.
- Tsolaki M, Kounti F, Agogiatou C, et al. Effectiveness of nonpharmacological approaches in patients with mild cognitive impairment. *Neurodegener Dis* 2011;8:138-45.
- Wei XH, Ji LL. Effect of handball training on cognitive ability in elderly with mild cognitive impairment. *Neurosci Lett* 2014;566:98-101.
- de Jager CA, Oulhaj A, Jacoby R, et al. Cognitive and clinical outcomes of homocysteine-lowering B-vitamin treatment in mild cognitive impairment: a randomized controlled trial. *Int J Geriatr Psychiatry* 2012;27:592-600.

Lee LK, Shahar S, Chin A-V, et al. Docosahexaenoic acid-concentrated fish oil supplementation in subjects with mild cognitive impairment (MCI): a 12-month randomised, double-blind, placebo-controlled trial. *Psychopharmacology (Berl)* 2013;225:605-12.

Naeini AM, Elmadfa I, Djazayeri A, et al. The effect of antioxidant vitamins E and C on cognitive performance of the elderly with mild cognitive impairment in Isfahan, Iran: a double-blind, randomized, placebo-controlled trial. *Eur J Nutr* 2014;53:1255-62.
